# Supplementary material for: An antibody-based biomarker discovery method by mass spectrometry sequencing of complementarity determining regions
Source: PubMed Central journal article supplement — Anal Bioanal Chem. 2010 Nov 24;399(3):1081–91. doi: 10.1007/s00216-010-4361-9 (PMC3018266; doi:10.1007/s00216-010-4361-9), 2010-11-24

**Analytical and Bioanalytical Chemistry**

**Electronic Supplementary Material**

**An antibody-based biomarker discovery method by mass spectrometry sequencing of complementarity determining regions**

Lennard J. M. Dekker, Lona Zeneyedpour, Eric Brouwer, Martijn M. van Duijn, Peter A. E. Sillevius Smitt, Theo M. Luiders

**Figure S1: Alignment of the variable region of the adalimumab light chain sequence against the IgG germline gene with the highest homology in the IMGT database.** The letters in bold below the aligned sequences indicate the mutations in adalimumab from the closest related IgG germline sequence. (<http://imgt.cines.fr/3Dstructure-DB/cgi/DomainGapAlign.cgi>)

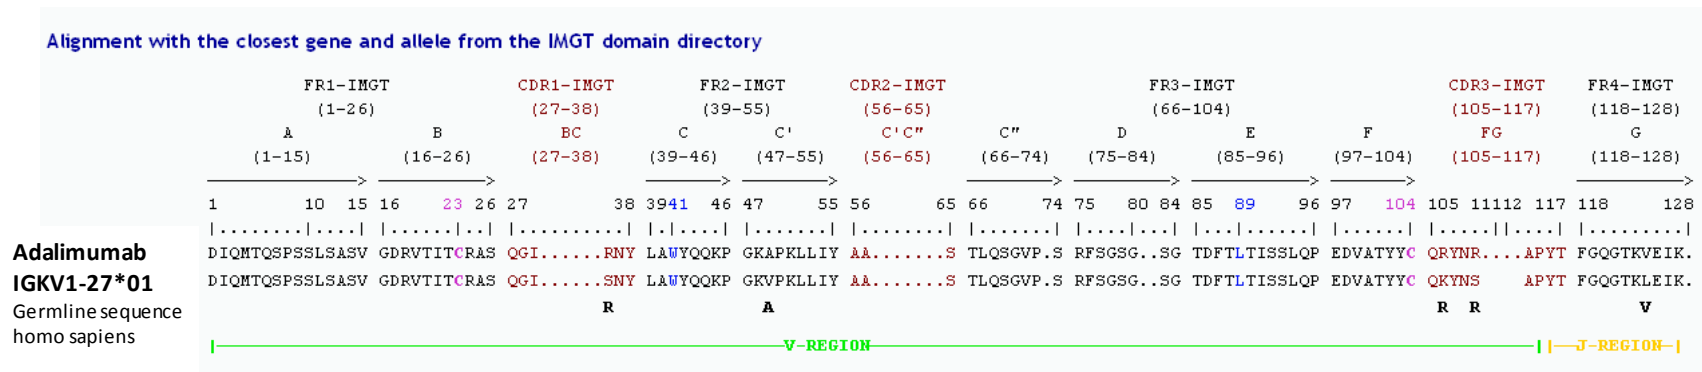

Supplement: 216_2010_4361_MOESM1_ESM.pdf [file 216_2010_4361_MOESM1_ESM.pdf]
